# Supplementary material for: Electronic Health Record-Integrated Clinical Decision Support for Clinicians Serving Populations Facing Health Care Disparities: Literature Review
Source: PubMed Central journal article supplement — Yearb Med Inform. 2022 Dec 4;31(1):184–98. doi: 10.1055/s-0042-1742518 (PMC9719761; doi:10.1055/s-0042-1742518), 2022-12-04
Supplement: 10-1055-s-0042-1742518-sstipelman.pdf [file 10-1055-s-0042-1742518-sstipelman.pdf]

## Appendix

### PubMed Search Terms

((social marginalization[mesh:noexp] OR marginaliz\*[TIAB] OR pansexual\*[TIAB] OR hermaphrodit\*[TIAB] OR "gender-expansive" [TIAB] OR LGTBQA[TIAB] OR LGBT\*[TIAB] OR GLBT\*[TIAB] OR LGB[TIAB] OR LGBQ\*[TIAB] OR LGBS\*[TIAB] OR M2F[TIAB] OR GLB[TIAB] OR GLBQ\*[TIAB] OR GLBs\*[TIAB] OR heteroflexible\*[TIAB] OR GBMSM\*[TIAB] OR msm[TIAB] OR TGNC\*[TIAB] OR YTW[TIAB] OR Gay[TIAB] OR gays[TIAB] OR lesbi\*[TIAB] OR bisexual\*[TIAB] OR transgender\*[TIAB] OR bicurious\*[TIAB] OR transpeople\*[TIAB] OR asexual\*[TIAB] OR "men loving men"[TIAB] OR "men who have sex with men"[TIAB] OR "women loving women"[TIAB] OR "women who have sex with women"[TIAB] OR transvestite[TIAB] OR "cross sex"[TIAB] OR crosssex\*[TIAB] OR crossgender\*[TIAB] OR F2M[TIAB] OR transperson\*[TIAB] OR hijra\*[TIAB] OR transsexual\*[TIAB] OR homosexual\*[TIAB] OR intersex\*[TIAB] OR queer\*[TIAB] OR genderqueer[TIAB] OR "gender queer"[TIAB] OR cisgender[TIAB] OR "trans people"[TIAB] OR "trans individual"[TIAB] OR "trans individuals"[TIAB] OR "trans person"[TIAB] OR "trans persons"[TIAB] OR "trans sexual"[TIAB] OR "trans man"[TIAB] OR "trans men"[TIAB] OR "trans male"[TIAB] OR "trans women"[TIAB] OR "trans woman"[TIAB] OR "trans female"[TIAB] OR "trans youth"[TIAB] OR "trans population"[TIAB] OR "trans gender"[TIAB] OR "sexual minority"[TIAB] OR "sexual minorities"[TIAB] OR dysphoria[TIAB] OR "sex reversal"[TIAB] OR "same sex"[TIAB] OR " transitioned people"[TIAB] OR " transitioned person"[TIAB] OR " transitioned population"[TIAB] OR "Sexual and Gender Minorities"[MESH] OR "Bisexuality"[MESH] OR "Homosexuality"[MESH] OR "Transsexualism"[MESH])) OR ((Aborigin\*[TIAB] OR Aleut\*[TIAB] OR Amerind\*[TIAB] OR autocht\*[TIAB] OR Eskimo\*[TIAB] OR indigenous[TIAB] OR Inuit\*[TIAB] OR Innuit\*[TIAB] OR Inuk[TIAB] OR Inuktitut-speaker\*[TIAB] OR Inupiat\*[TIAB] OR "First Nation"[TIAB] OR "First Nations"[TIAB] OR "First Peoples"[TIAB] OR Kalaallit\*[TIAB] OR Metis[TIAB] OR Native[TIAB] OR Natives[TIAB] OR tribe[TIAB] OR tribes[TIAB] OR tribal[TIAB] OR Abenaki\*[TIAB] OR Pima[TIAB] OR Pimas[TIAB] OR Navajo\*[TIAB] OR Cherokee\*[TIAB] OR Shawnee\*[TIAB] OR Lakota[TIAB] OR Coughatta[TIAB] OR Tlingit\*[TIAB] OR Arapaho\*[TIAB] OR Assiniboine[TIAB] OR Beothuk[TIAB] OR Blackfeet[TIAB] OR Blackfoot[TIAB] OR Cabazon\*[TIAB] OR Caddo\*[TIAB] OR Chickasaw[TIAB] OR Chippewa[TIAB] OR Chitimacha\*[TIAB] OR Choctaw\*[TIAB] OR Cocopah\*[TIAB] OR "Coeur D'alene"[TIAB] OR Comanche\*[TIAB] OR Muscogee\*[TIAB] OR Duwamish[TIAB] OR Elwha\*[TIAB] OR Flathead\*[TIAB] OR Goshute\*[TIAB] OR Ho-Chunk\*[TIAB] OR Hopi[TIAB] OR Hopis[TIAB] OR Hoopa\*[TIAB] OR S'klallam[TIAB] OR Jatibonicu[TIAB] OR Jumano\*[TIAB] OR Kalapuya\*[TIAB] OR Kiowa\*[TIAB] OR Kootenai\*[TIAB] OR Lemhi\*[TIAB] OR Shoshone\*[TIAB] OR Makah\*[TIAB] OR Pequot\*[TIAB] OR Mechoopda\*[TIAB] OR Menominee\*[TIAB] OR Miccosukee\*[TIAB] OR Mi'kmaq[TIAB] OR Mohegan\*[TIAB] OR Muscogee\*[TIAB] OR Navajo\*[TIAB] OR "Nez Perce"[TIAB] OR "Nez Pierce"[TIAB] OR Oneida\*[TIAB] OR Osage\*[TIAB] OR Passamaquoddy[TIAB] OR Pawnee\*[TIAB] OR "Pend D'oreille"[TIAB] OR Pomo[TIAB] OR Pomos[TIAB] OR Potawatomi\*[TIAB] OR Pueblo\*[TIAB] OR Quinault\*[TIAB] OR Salish[TIAB] OR Saponi[TIAB] OR Saponis[TIAB] OR Seminole\*[TIAB] OR Shawnee\*[TIAB] OR Shoshone\*[TIAB] OR Siletz[TIAB] OR Nakota[TIAB] OR S'klallam[TIAB] OR Suquamish[TIAB] OR Taino[TIAB] OR Tainos[TIAB] OR Tohono[TIAB] OR "O'Odham"[TIAB] OR Tunica-Biloxi[TIAB] OR Tunicas[TIAB] OR Umatilla\*[TIAB] OR Umpqua\*[TIAB] OR Waccamaw\*[TIAB] OR Wampanoag\*[TIAB] OR Washoe\*[TIAB] OR Wiyot\*[TIAB] OR Yakama\*[TIAB] OR Ute[TIAB] OR Utes[TIAB] OR Apache\*[TIAB] OR Cheyenne\*[TIAB] OR Spokane[TIAB] OR Tuscarora[TIAB] OR Sioux[TIAB] OR (Indian\*[TIAB] NOT (India[TIAB] OR China[TIAB] OR Chinese\*[TIAB])) OR "disabled persons"[mesh:noexp] OR amputees[mesh:noexp] OR "disabled children"[mesh:noexp] OR "Persons with Mental Disabilities"[mesh:noexp] OR "mentally ill persons"[mesh:noexp] OR "para-athletes"[mesh:noexp] OR "persons with hearing impairments"[mesh:noexp] OR "visually impaired persons"[mesh:noexp] OR ("ethnic groups"[mesh:noexp] OR "african americans"[mesh:noexp] OR amish[mesh:noexp] OR arabs[mesh:noexp] OR "asian americans"[mesh:noexp] OR "indigenous peoples"[mesh:noexp] OR "alaska natives"[mesh:noexp] OR inuits[mesh:noexp] OR roma[mesh:noexp] OR "hispanic americans"[mesh:noexp] OR "mexican americans"[mesh:noexp] OR jews[mesh:noexp]) OR "emigrants and immigrants"[mesh:noexp] OR "undocumented immigrants"[mesh:noexp] OR refugees[mesh:noexp] OR (immigrant\*[TIAB] OR emigrant\*[TIAB] OR foreigner\*[TIAB] OR refugee\*[TIAB] OR "asylum seeker\*"[TIAB]) OR ((isolated[TI] OR remote[TI] OR "underserved medically"[TI] OR "medically underserved"[TI] OR "under-served medically"[TI]) AND (area[TI] OR areas[TI] OR population\*[TI] OR community[TI] OR communities[TI] OR group[TI] OR groups[TI] OR band[TI] OR bands[TI] OR reserve[TI] OR reserves[TI] OR "physician shortage area\*" OR homeless\*[TIAB] OR "street child\*"[TIAB] OR "street kid\*"[TIAB] OR "street youth\*"[TIAB] OR "street people\*"[TIAB] OR "street person\*"[TIAB] OR incarcerated[TIAB] OR inmate\*[TIAB] OR migrant\*[TIAB] OR "transient person\*"[TIAB] OR transients[TIAB] OR prisoner\*[TIAB] OR underinsured[TIAB] OR uninsured[TIAB] OR "under-insured"[TIAB] OR vagabond\*[TIAB] OR "homeless

persons"[mesh:noexp] OR "homeless youth"[mesh:noexp] OR "medically uninsured"[mesh:noexp] OR "Vulnerable Populations"[mesh:noexp] OR "Rural Population"[mesh:noexp] OR "rural health"[mesh:noexp] OR (Medically Underserved Area[mesh:noexp] OR health services accessibility[mesh:noexp] OR health equity[mesh:noexp] OR healthcare disparities[mesh:noexp]))) OR healthdisparities[sb])

AND

("decision support systems, clinical"[MESH] OR "decision making, computer assisted"[MESH] OR ("clinical decision support") OR "computerized decision support"[Text Word] OR "best practice alert" [Text Word] AND "electronic health record" NOT patient portal NOT mobile health NOT mhealth[Text Word] OR "reminder systems" NOT SMS NOT text messaging NOT smartphone app NOT telephone[Text Word] OR ("guideline adherence"[MESH] AND "medical informatics"[MESH]))
